# Supplementary material for: A new transgenic rice line exhibiting enhanced ferric iron reduction and phytosiderophore production confers tolerance to low iron availability in calcareous soil
Source: PubMed Central journal article supplement (PMC5344405; doi:10.1371/journal.pone.0173441), 2017-03-09
Supplement: pone.0173441.s001.pdf [file pone.0173441.s001.pdf]

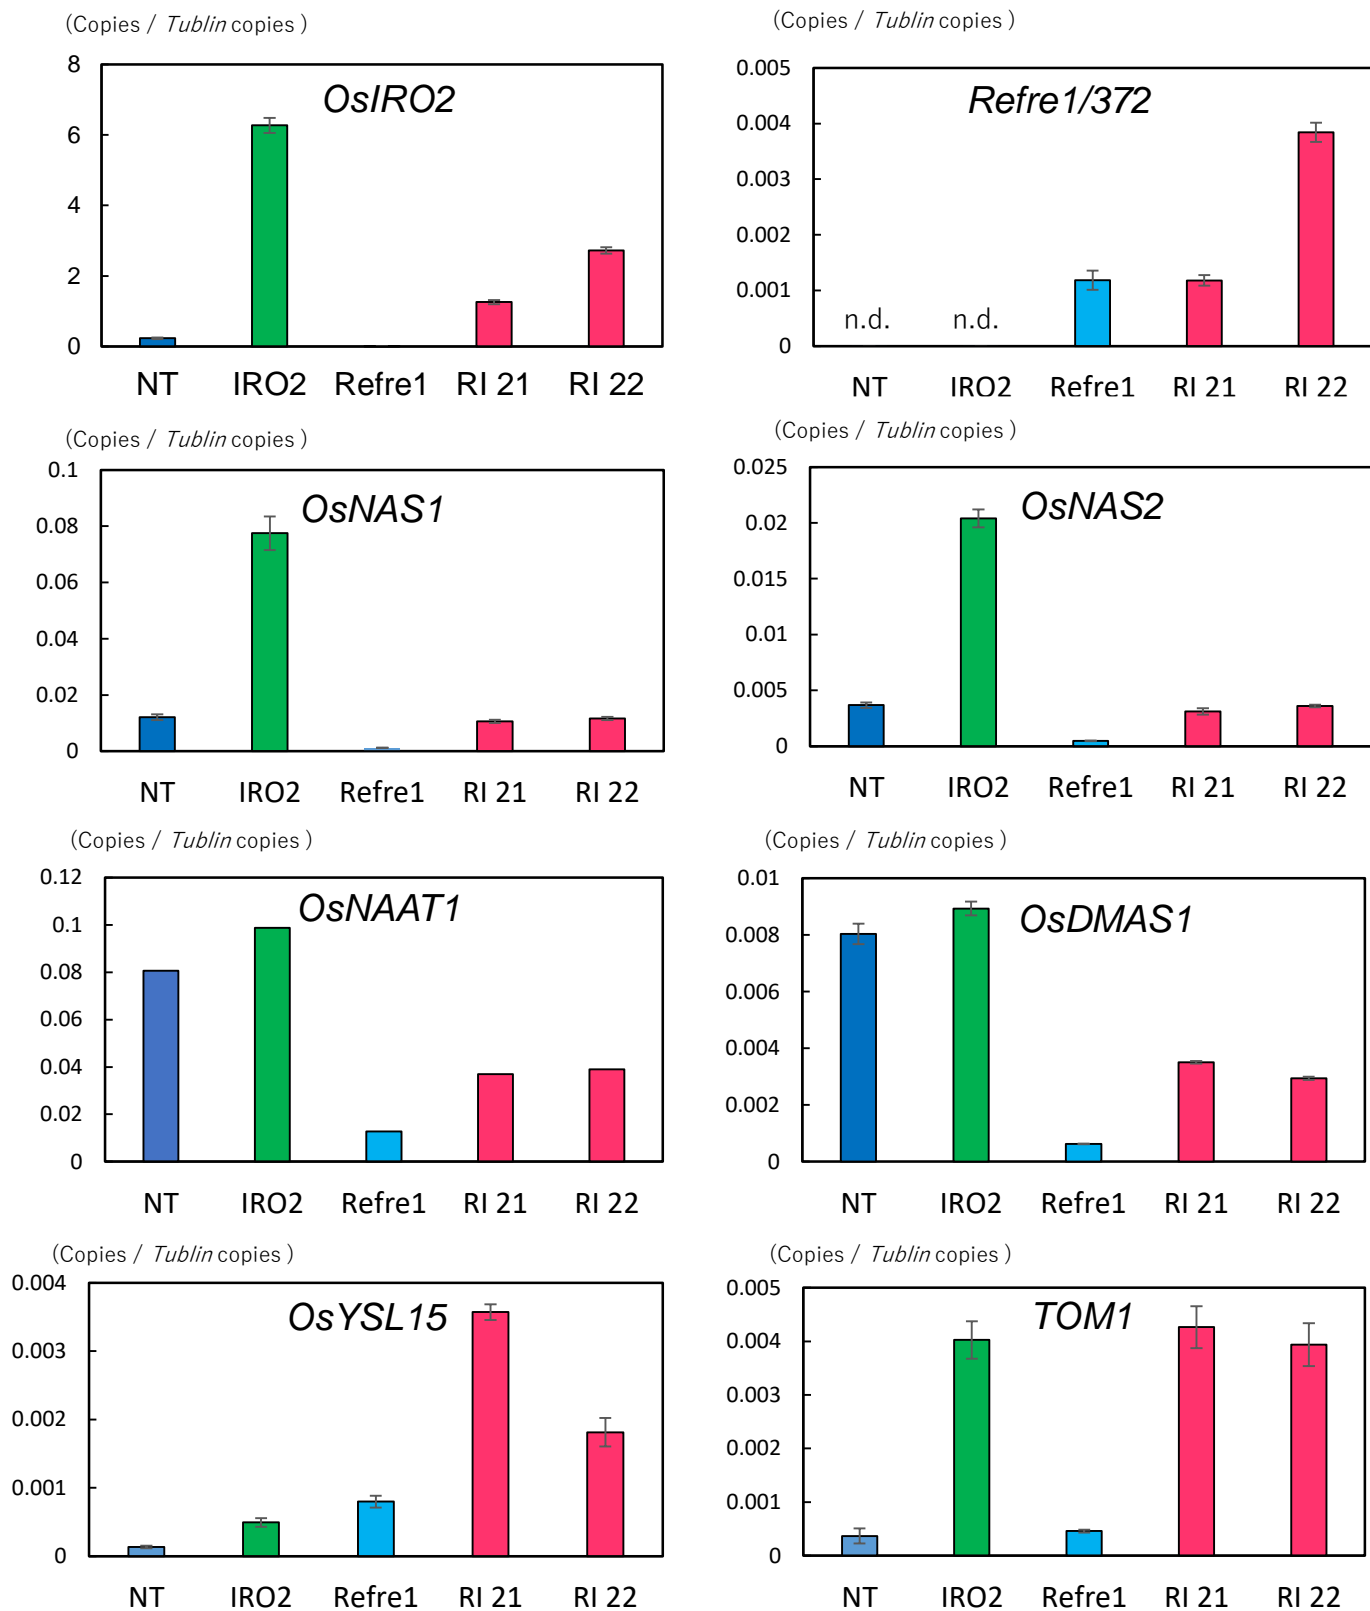

Figure S1
